# Supplementary material
Source: Elsevier journal article supplement (https://www.sciencedirect.com/science/article/pii/S0325754118300634)

**SUPPLEMENTARY MATERIAL**

**1-**Immunoblot analysis of serum samples from groups of mice at 30 days (second immunization) and 44 days (post-challenge) after initial immunization with EHV-1 gD. Lane \*: molecular weight marker (PageRuler Prestained Protein Ladder, Thermo Scientific, USA). (a) Serum from groups A, B, C, D and E after the second immunization, and groups A, B, C, D, E and J post-challenge; (b) Serum from groups F, G, H and I after the second immunization, and groups F, G, H, I, K, L and M post-challenge. CFA: Complete Freund's Adjuvant; S: Specol; M: Montanide ISA 206; i.p.: intraperitoneal; s.c.: subcutaneous; i.n.: intranasal.

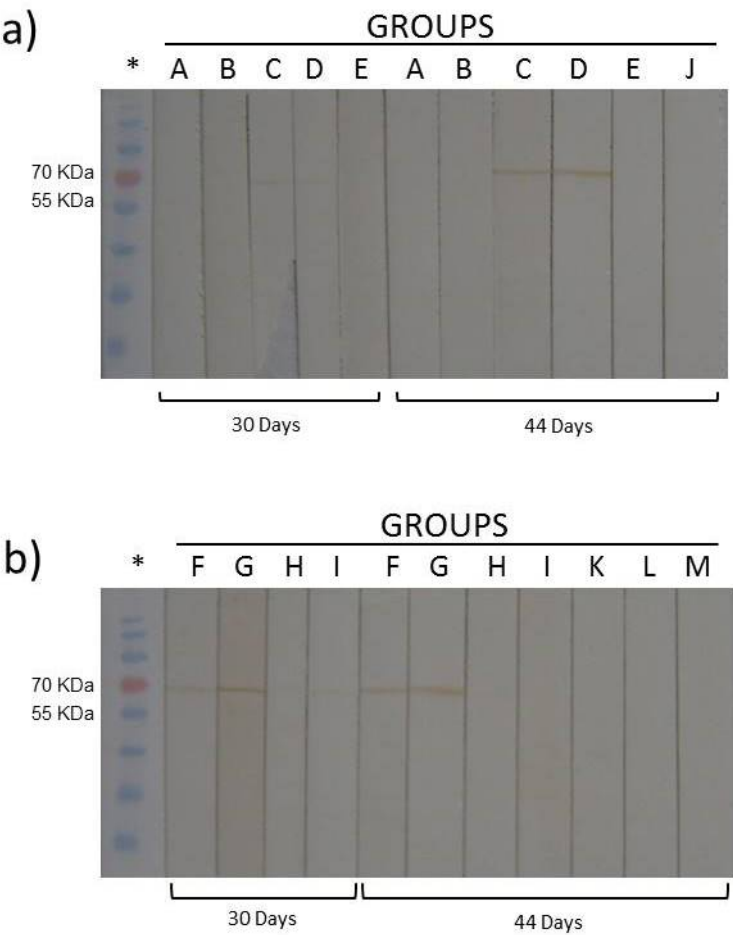

A (gD i.p.), B (gD s.c.), C (gD+CFA i.p.), D (gD+CFA s.c.), E (gD i.n.),  
F (gD+S i.p.), G (gD+S s.c.), H (gD+M i.p.), I (gD+M s.c.), J (PBS+CFA  
i.p.), K (PBS+S s.c.), L (PBS+M i.p.), and M (PBS i.n.)

**2-** Mucosal immune response induced by intranasal administration of EHV-1 gD in mice. Groups of six mice were immunized with two doses (days 0 and 20) of EHV-1 gD (gD i.n.) or with PBS (control). Production of IgA from bronchoalveolar lavages (BAL) samples was evaluated by indirect ELISA. Each bar represents the average of  $n = 3$  at day 7 and 14 after second immunization.

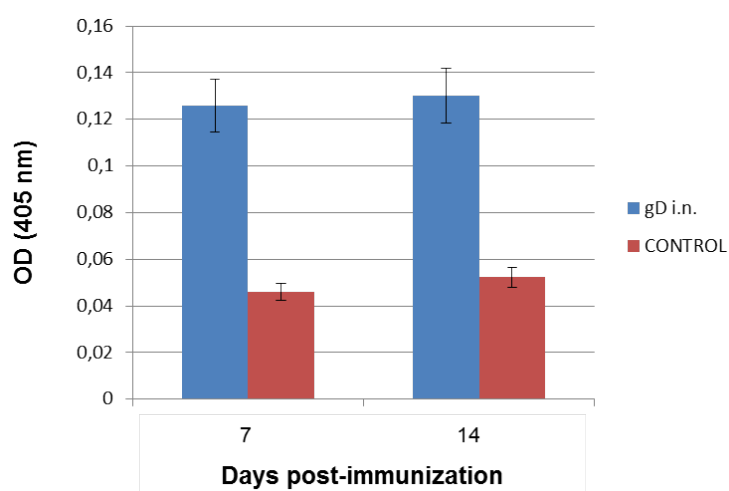

Supplement: mmc1 [file S0325754118300634:mmc1.pdf]
